# Supplementary material for: CXCR4-antagonist Peptide R-liposomes for combined therapy against lung metastasis
Source: Royal Society of Chemistry journal article supplement (doi:10.1039/c5nr06335c), 2016-01-01
Supplement: c5nr06335c3.pdf [file c5nr06335c3.pdf]

## Supplementary Legend

**Supplementary Figure 1.** Dose-response of the effect of PeptideR on A498 cells CXCL12-induced migration. Results represent the mean of duplicate determinations plus minus S.D. (n = 3).

**Supplementary Figure 2.** Plasma stability. A solution of 1 mg/ml of each compound was prepared in water, and 150 µl aliquots were mixed with 150 µl of pre-warmed (37°C) plasma. At selected time points (0, 15, 30, 60, 120 and 180 min), samples (50 µl) were collected and mixed with 1% TFA in acetonitrile (75 µl) to precipitate plasma proteins which were removed by centrifugation at 12,000 rpm for 10 minutes. The supernatant was analysed by HPLC-ESI-MS using a Phenomenex Luna C18 column (5 µm, 4.6 × 150 mm) and an elution gradient of 10% to 90% solvent B over 20 min (Solvent A: 0.1% TFA in water; solvent B: 0.1% TFA in ACN) at a flow rate of 1 ml/min.
