# Supplementary figures and images for: CXCR4-antagonist Peptide R-liposomes for combined therapy against lung metastasis
Source: Royal Society of Chemistry journal article supplement (doi:10.1039/c5nr06335c), 2016-01-01

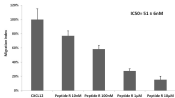

Supplementary Figure 1

Supplement: c5nr06335c1.pdf [file c5nr06335c1.pdf]

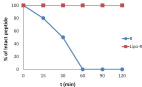

Supplementary Figure 2

Supplement: c5nr06335c2.pdf [file c5nr06335c2.pdf]
